# Supplementary material for: Acetylene black derived hollow carbon nanostructure and its application in lithium–sulfur batteries
Source: Royal Society of Chemistry journal article supplement (doi:10.1039/c3ra42835d), 2013-01-01
Supplement: c3ra42835d.pdf [file c3ra42835d.pdf]

## Supplementary Information

### Acetylene black derived hollow carbon nanostructure and its application in lithium-sulfur batteries

Jingjing Tang, Juan Yang and Xiangyang Zhou

School of Metallurgy and Environment, Central South University, Lushan South Road 932, Changsha, China. Fax: +86 731 8871017; Tel: +86 731 88836329; E-mail: [hncsyjy308@163.com](mailto:hncsyjy308@163.com)

#### 1. Experiment

##### *1.1 Preparation of hollow carbon nanostructure (HCS)*

Hollow carbon nanostructure was obtained via one-pot acid steaming process. Typically, 1 g pristine acetylene black (p-AB) powder (TIMCAL, Sweden) were placed on the SiO<sub>2</sub> griddle of a sand core funnel, and then put into a Teflon-vessel, to the bottom of which 20 ml concentrated HNO<sub>3</sub> (65-68 wt%) has been added. The Teflon-vessel was subsequently sealed into a stainless steel autoclave and then moved to an oven at a temperature of 150 °C for 8h. After cooled to room temperature, the obtained powder was washed with deionized water and dried at 120 °C overnight.

##### *1.2 Preparation of HCS/S composite*

First, Sodium thiosulphate and Sodiumbisulfite was dissolved in dilute H<sub>2</sub>SO<sub>4</sub> solution. Then, a certain amount of as-prepared HCS was dispersed into the above solution by ultrasonication. The result solution was transferred to a sealed Teflon-lined autoclave to carry out hydrothermal reaction at 130-150 °C for 2 h. After cooled to room temperature, HCS-S product was obtained by washing and drying at 55 °C. For comparison, p-AB-S was synthesized under the same hydrothermal reaction.

#### 2. Material Characterization

The crystal structures of samples were measured by X-ray powder diffraction (XRD, Rigaku-TTRIII, Cu K $\alpha$ ) at a scanning rate of 8° min<sup>-1</sup>. Raman spectra were obtained using a

LabRAM Hr800 from HORIBA JOBIN YVON. The functional groups on the surface of samples were investigated by Fourier transform infrared spectroscopy (FT-IR) spectroscopy (Nicolet 6700). The morphology and structure of samples were examined by field emission scanning electron microscopy (NOVA NANO SEM230) and field emission transmission electron microscopy (FETEM, JEM-2100F). The content of sulfur in the HCS-S sample was calculated based on the thermogravimetric analysis (TGA, SDTQ600) data.

### 3. Electrochemical Test

For preparing working electrodes, a mixture of HCS-S and PVDF binder at a weight ratio of 9:1 was dissolved in NMP to produce a slurry that was then coated on aluminum foil and dried at 55°C. Customized 2025 coin cell was assembled in an argon-filled glove box using lithium metal as the counter electrode and a microporous polyethylene separator. The electrolyte solution was 1 M  $\text{LiN}(\text{CF}_3\text{SO}_2)_2$  (LITFSI) dissolved in a mixture of 1,3-dioxolane (DOL) and dimethoxymethane (DME) (1:1 by volume) with the addition of  $\text{LiNO}_3$  (0.1 M). Cyclic voltammetry (CV) tests were performed on a SOLARTRON 1470E electrochemical workstation between 2.8 and 1.7 V with a scan rate of  $0.1 \text{ mV s}^{-1}$ . The charge-discharge performances of the batteries were measured galvanostatically at a charge-discharge current density of  $200 \text{ mA g}^{-1}$  of active sulfur, and the potential window was controlled between 1.7 and 2.8 V at room temperature.

### 4. Figure

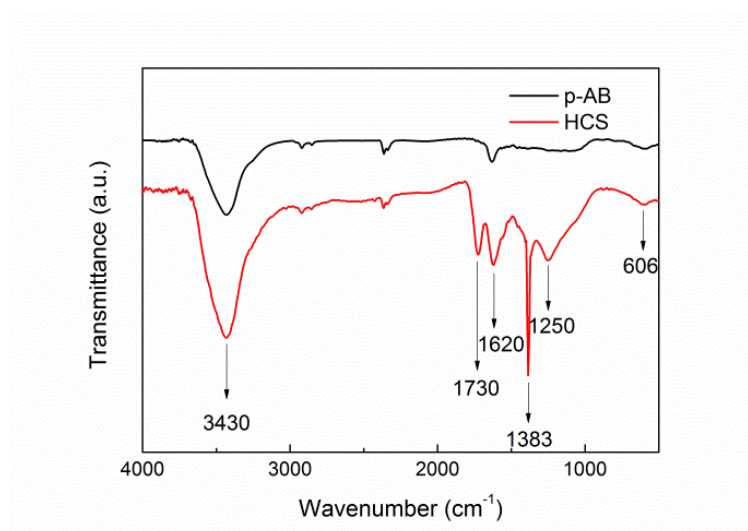

**Fig. S1** FI-IR spectra of p-AB and HCS.

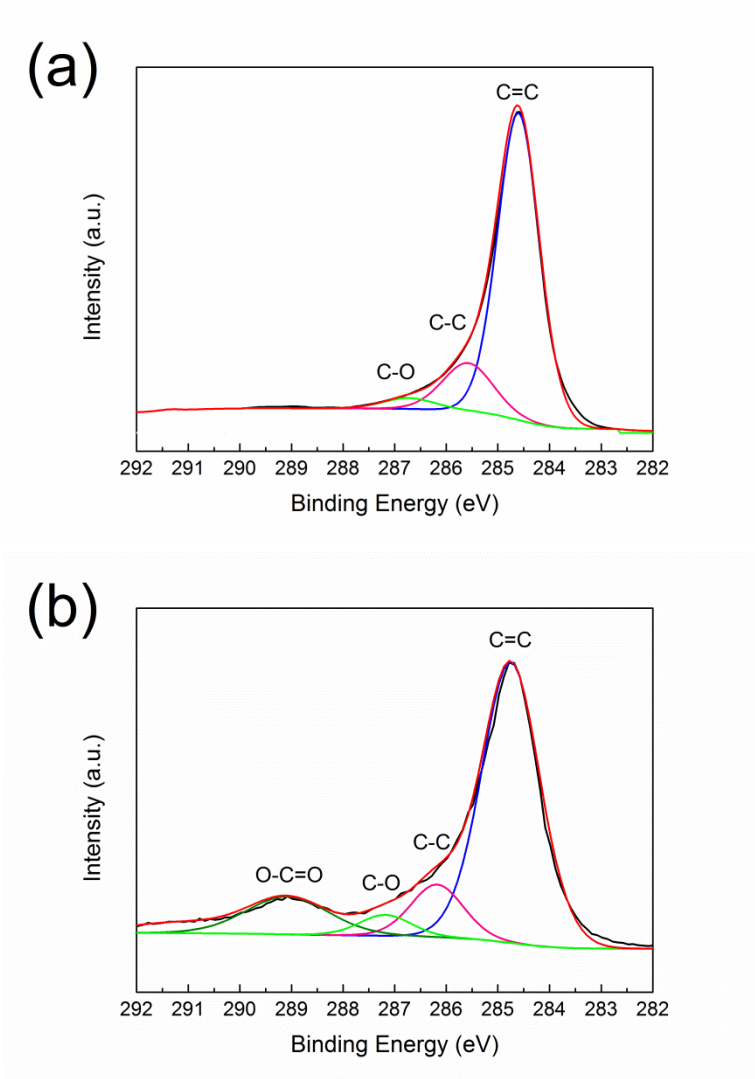

**Fig. S2** C 1s XPS spectra of (a) p-AB and (b) HCS.

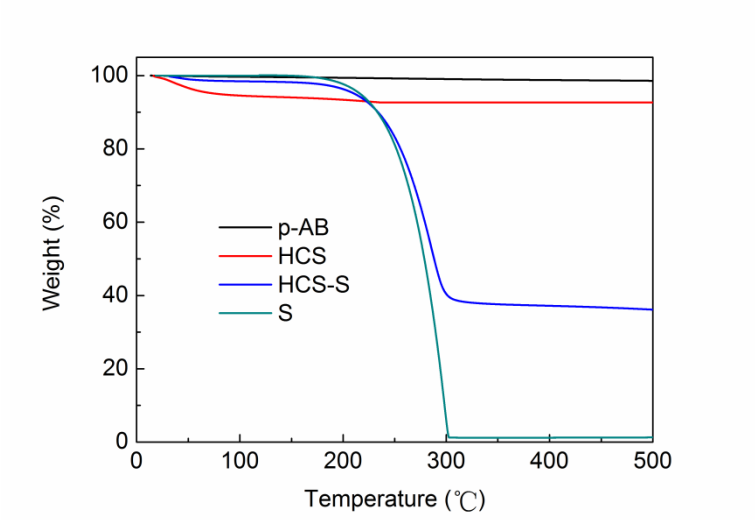

**Fig. S3** TGA curves of samples.

**5. Table**

**Table S1.** Physical properties derived from XRD patterns.

| Sample | (002) | $d_{002}^*$ | Peak FWHM | Lc (002)** |
|--------|-------|-------------|-----------|------------|
|        | /°    | /nm         | /°        | /nm        |
| p-AB   | 24.74 | 0.358       | 5.876     | 2.886      |
| HCS    | 25.11 | 0.353       | 3.786     | 4.518      |
